# Supplementary material for: Combining clinical notes with structured electronic health records enhances the prediction of mental health crises
Source: PubMed Central journal article supplement — Cell Rep Med. 2023 Oct 31;4(11):101260. doi: 10.1016/j.xcrm.2023.101260 (PMC10694623; doi:10.1016/j.xcrm.2023.101260), 2023-10-31
Supplement: mmc1.pdf [file mmc1.pdf]

**Cell Reports Medicine, Volume 4**

**Supplemental information**

**Combining clinical notes with structured  
electronic health records enhances  
the prediction of mental health crises**

**Roger Garriga, Teodora Sandra Buda, João Guerreiro, Jesús Omaña Iglesias, Iñaki Estella  
Aguerri, and Aleksandar Matic**

# Supplementary Information

| Features in LogReg5                                |
|----------------------------------------------------|
| Number of crisis in the last year                  |
| Weeks since last crisis                            |
| Number of days hospitalized during the last crisis |
| Maximum length of stay during the last crisis      |
| Maximum crisis severity during the last crisis     |

**Supplementary Table 1.** List of features used to build the LogReg5 baseline. Related to STAR Methods - Machine learning prediction models.

**a** Number of notes per patient

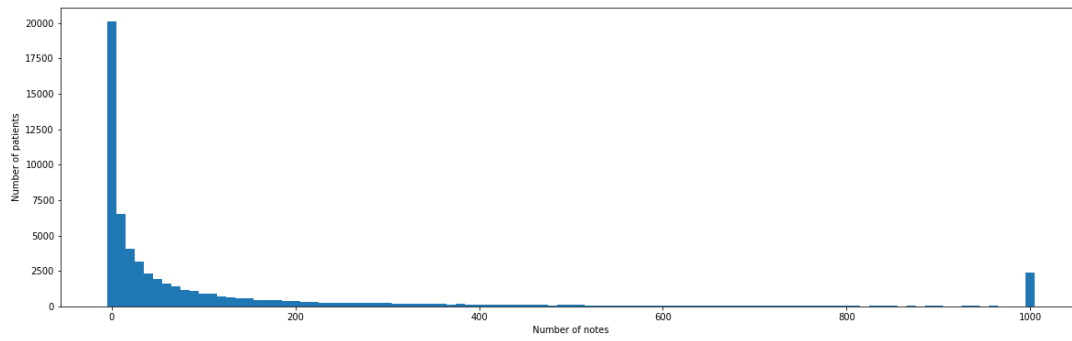

**b** Number of notes per patient-week

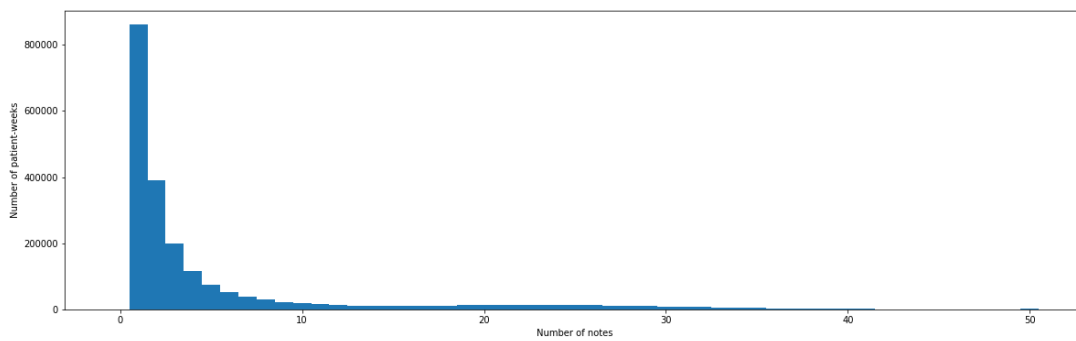

**c** Average number of weeks between notes per patient

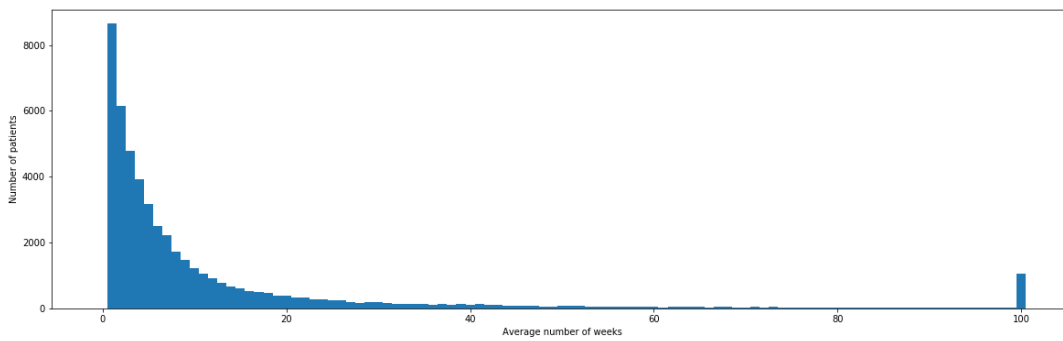

**Supplementary Figure 1.** Statistics regarding clinical notes, related to Table 1. **a** Histogram of the total number of notes about each patient, for those patients that had at least 1 note. Each bin has width 10 except for the rightmost one which includes all patients with 1000 or more notes. **b** Histogram of the number of notes taken per patient and per week. Each bin has width 1 except for the rightmost one which includes all patient-weeks with 50 or more notes. **c** Histogram of the average number of weeks between notes taken per patient, for those patients that had notes from at least 2 distinct weeks. Each bin has width 1 except for the rightmost one which includes all patients with an average number of weeks of at least 100 weeks.

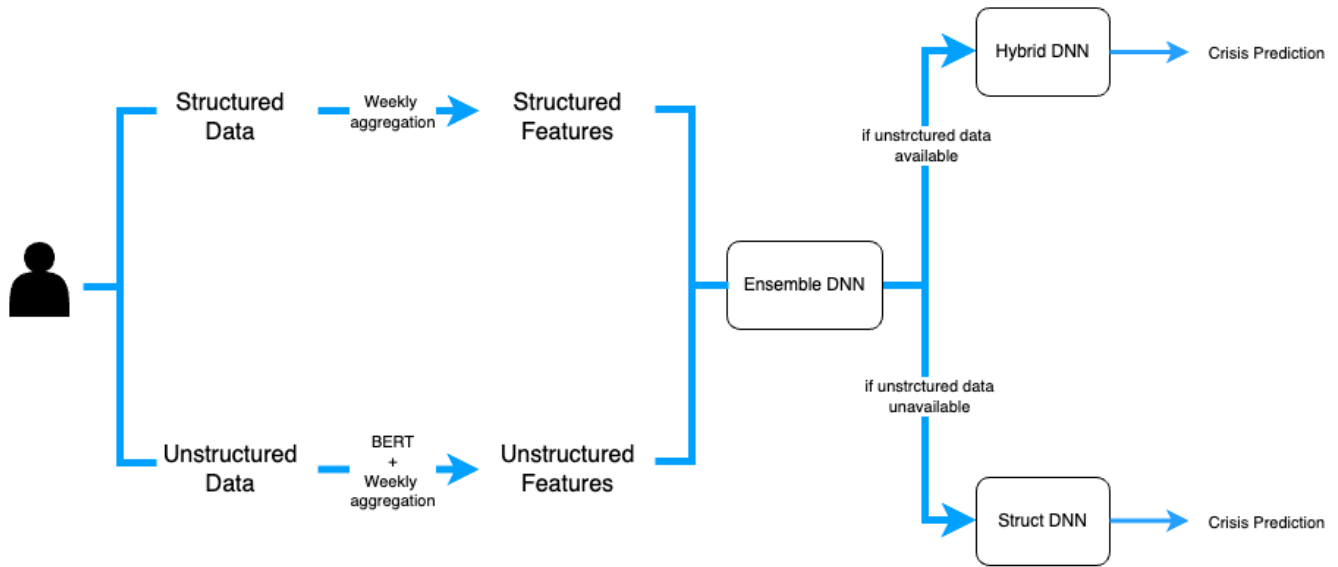

**Supplementary Figure 2.** Diagram illustrating the inference phase of the Ensemble DNN, detailing how it generates crisis predictions. Related to Figure 1.

| Model        | Unstruct DNN | Hybrid DNN | Struct XGB | Ensemble DNN |
|--------------|--------------|------------|------------|--------------|
| Unstruct DNN | -            | 0.314      | 0.260      | 0.300        |
| Hybrid DNN   | -0.314       | -          | 0.107      | 0.242        |
| Struct XGB   | -0.260       | -0.107     | -          | 0.160        |
| Ensemble DNN | -0.300       | -0.242     | -0.160     | -            |

**Supplementary Table 2.** Net reclassification analysis. Comparison of models based on percentile based Net Reclassification Improvement, using 1000 categories. The model specified in the row header serves as the reference. Related to Table 2

| Perc. of weeks with unstruc. data | Number of patients (%) | Crisis episodes |       | Prevalence (%) |       |
|-----------------------------------|------------------------|-----------------|-------|----------------|-------|
|                                   |                        | Train           | Test  | Train          | Test  |
| (0-10]                            | 41,392 (69.3)          | 48,660          | 8,161 | 0.856          | 0.592 |
| (10-20)                           | 8,507 (14.2)           | 16,118          | 3,250 | 2.818          | 2.072 |
| (20-30]                           | 4,011 (6.7)            | 9,180           | 2,034 | 3.921          | 3.082 |
| (30-40]                           | 2,344 (3.9)            | 6,783           | 1,323 | 4.975          | 3.646 |
| (40-50]                           | 1,363 (2.3)            | 4,523           | 861   | 5.769          | 4.395 |
| (50-100]                          | 2,133 (3.6)            | 8,615           | 1,468 | 8.733          | 5.773 |

**Supplementary Table 3.** Number of patients, crisis episodes and target prevalence per subgroup of patients based on the percentage of weeks with unstructured data. Related to Figure 2.

| Note subgroups | Mean AUPRC (std)      |               |                       | t-statistic (p-value)   |
|----------------|-----------------------|---------------|-----------------------|-------------------------|
|                | Struc XGB             | Unstruc DNN   | Hybrid DNN            | Struc XGB vs Hybrid DNN |
| ≤ 10%          | <b>0.048 (0.012)*</b> | 0.032 (0.008) | 0.032 (0.007)         | 13.196 (<0.001)         |
| (10%, 20%]     | 0.108 (0.021)         | 0.074 (0.014) | <b>0.121 (0.023)*</b> | -5.203 (<0.001)         |
| (20%, 30%]     | 0.150 (0.036)         | 0.097 (0.023) | <b>0.160 (0.035)*</b> | -3.468 (0.001)          |
| (30%, 40%]     | 0.176 (0.043)         | 0.115 (0.031) | <b>0.185 (0.050)*</b> | -2.821 (0.007)          |
| (40%, 50%]     | 0.198 (0.047)         | 0.126 (0.038) | <b>0.223 (0.059)*</b> | -4.509 (<0.001)         |
| > 50%          | 0.236 (0.049)         | 0.150 (0.034) | <b>0.247 (0.045)*</b> | -3.583 (0.001)          |

**Supplementary Table 4.** AUPRC comparison between the models trained in structured (Struc XGB), unstructured (Unstruc DNN) or both (Hybrid DNN) per each note subgroup. (\* indicates a statistically significant difference <0.05). Related to Figure 2.

| Note subgroups | Mean AUROC (std)      |               |                       | DeLong statistic (p-value) |
|----------------|-----------------------|---------------|-----------------------|----------------------------|
|                | Struc XGB             | Unstruc DNN   | Hybrid DNN            | Struc XGB vs Hybrid DNN    |
| ≤ 10%          | <b>0.784 (0.012)*</b> | 0.743 (0.024) | 0.738 (0.024)         | 24.276 (<0.001)            |
| (10%, 20%]     | 0.777 (0.019)         | 0.715 (0.023) | <b>0.778 (0.020)</b>  | -0.953 (0.341)             |
| (20%, 30%]     | 0.772 (0.023)         | 0.705 (0.025) | <b>0.775 (0.021)*</b> | -1.986 (0.047)             |
| (30%, 40%]     | 0.770 (0.033)         | 0.704 (0.035) | <b>0.773 (0.029)*</b> | -2.033 (0.042)             |
| (40%, 50%]     | 0.762 (0.033)         | 0.700 (0.033) | <b>0.765 (0.034)</b>  | -1.260 (0.208)             |
| > 50%          | 0.772 (0.027)         | 0.692 (0.034) | <b>0.781 (0.028)*</b> | -4.703 (<0.001)            |

**Supplementary Table 5.** AUROC comparison between the models trained in structured (Struc XGB), unstructured (Unstruc DNN) or both (Hybrid DNN) per each note subgroup. (\* indicates a statistically significant difference <0.05). Related to Figure 2.

|                     | Target prevalence % | Crisis occurred % | Crisis flagged % | Crisis detected % |
|---------------------|---------------------|-------------------|------------------|-------------------|
| <i>Gender</i>       |                     |                   |                  |                   |
| Male                | 1.3%                | 51.3%             | 51.7%            | 52.7%             |
| Female              | 1.3%                | 48.6%             | 48.2%            | 47.1%             |
| <i>Ethnic group</i> |                     |                   |                  |                   |
| White               | 1.4%                | 66.8%             | 68.7%            | 69.3%             |
| Asian               | 1.3%                | 14.0%             | 12.9%            | 12.8%             |
| Black               | 1.6%                | 8.4%              | 9.3%             | 8.8%              |
| Mixed               | 1.5%                | 6.4%              | 6.4%             | 6.5%              |
| Not known           | 0.7%                | 4.4%              | 2.4%             | 2.7%              |

**Supplementary Table 6.** Evaluation of the Ensemble DNN model's performance by gender and ethnicity using the following metrics: the percentage of correctly identified crisis episodes, the percentage of crisis flagged by the algorithm, and the comparison of crisis incidents per subgroup. This assessment considers the top 1000 patients per week, ranked by predicted risk score. Related to Table 2.

|                     | <b>Target prevalence %</b> | <b>AUROC</b> | <b>AUPRC</b> |
|---------------------|----------------------------|--------------|--------------|
| <i>Gender</i>       |                            |              |              |
| Male                | 1.3%                       | 0.865        | 0.130        |
| Female              | 1.3%                       | 0.865        | 0.140        |
| <i>Ethnic group</i> |                            |              |              |
| White               | 1.4%                       | 0.866        | 0.138        |
| Asian               | 1.3%                       | 0.853        | 0.133        |
| Black               | 1.6%                       | 0.859        | 0.153        |
| Mixed               | 1.5%                       | 0.854        | 0.143        |
| Not known           | 0.7%                       | 0.882        | 0.129        |

**Supplementary Table 7.** Evaluation of the Ensemble DNN model's performance by gender and ethnicity using AUROC and AUPRC. Related to Table 2.
